# Supplementary material
Source: ML conference proceedings conference paper supplement (https://proceedings.neurips.cc/paper_files/paper/2024/hash/d758d7c0a88d741c8ca4637579c9df87-Abstract.html)
Supplement: Supplementary file 1 [file d758d7c0a88d741c8ca4637579c9df87-Supplemental-Datasets_and_Benchmarks_Track.pdf]

## 691 **A.6 Supplementary materials**

### 692 **A.6.1 Dataset documentation and intended uses**

693 Dataset documentation is available at [https://gin.g-node.org/pollytur/sensorium\\_2023\\_](https://gin.g-node.org/pollytur/sensorium_2023_dataset)  
694 [dataset](https://gin.g-node.org/pollytur/sensorium_2023_dataset) (dataset structure) and in the whitepaper (Turishcheva et al., 2023) (data collection method-  
695 ology). Intended usage examples (loading of the data and models training) are available here:  
696 [https://github.com/ecker-lab/sensorium\\_2023/tree/main/notebooks](https://github.com/ecker-lab/sensorium_2023/tree/main/notebooks).

### 697 **A.6.2 URL for data download**

698 Five competition mice: [https://gin.g-node.org/pollytur/sensorium\\_2023\\_dataset](https://gin.g-node.org/pollytur/sensorium_2023_dataset)  
699 Five mice with ood responses [https://gin.g-node.org/pollytur/sensorium\\_2023\\_data/](https://gin.g-node.org/pollytur/sensorium_2023_data/src/798ba8ad041d8f0f0ce879af396d52c7238c2730)  
700 [src/798ba8ad041d8f0f0ce879af396d52c7238c2730](https://gin.g-node.org/pollytur/sensorium_2023_data/src/798ba8ad041d8f0f0ce879af396d52c7238c2730).

### 701 **A.6.3 Croissant url**

702 As the croissant library currently does not support the Video and List data types ([https://](https://github.com/mlcommons/croissant/issues/690)  
703 [github.com/mlcommons/croissant/issues/690](https://github.com/mlcommons/croissant/issues/690)), we generated the high-level meta file us-  
704 ing kaggle interface: [https://github.com/ecker-lab/sensorium\\_2023/blob/croissant\\_](https://github.com/ecker-lab/sensorium_2023/blob/croissant_file/sensorium-2023-metadata.json)  
705 [file/sensorium-2023-metadata.json](https://github.com/ecker-lab/sensorium_2023/blob/croissant_file/sensorium-2023-metadata.json)

### 706 **A.6.4 Author statement**

707 Author bear all responsibility in case of violation of rights. Both data and code are available under  
708 Creative Commons Attribution-NonCommercial-NoDerivatives 4.0 International License.

### 709 **A.6.5 Hosting, licensing, and maintenance plan**

710 Following SENSORIUM 2022, data is hosted at <https://gin.g-node.org>, which is a publicly  
711 available platform, where data can be downloaded both via GUI or command line. The code is  
712 hosted in a public repository via <https://github.com>. The data does not need maintenance. Both  
713 data and code are available under Creative Commons Attribution-NonCommercial-NoDerivatives  
714 4.0 International License. In case of any problems with the data hosting webpage, the authors have  
715 local copies of data and would re-release it.
